# Supplementary material for: Enhancing the sensitivity of a Nd3+,Yb3+:YVO4 nanocrystalline luminescent thermometer by host sensitization
Source: Royal Society of Chemistry journal article supplement (doi:10.1039/c9cp01806a), 2019-01-01
Supplement: c9cp01806a1.pdf [file c9cp01806a1.pdf]

## Supporting Information

### Enhancing the sensitivity of $\text{Nd}^{3+}$ , $\text{Yb}^{3+}:\text{YVO}_4$ nanocrystalline luminescent thermometer by host sensitization

L. Marciniak<sup>1\*</sup>, A. Bednarkiewicz<sup>1</sup>, K. Trejgis<sup>1</sup>, K. Maciejewska<sup>1</sup>, K. Elzbieciak<sup>1</sup>, K. Ledwa<sup>1</sup>

<sup>1</sup>Institute of Low Temperature and Structure Research, Polish Academy of Sciences, Okólna 2, 50-422 Wrocław, Poland

\* corresponding author: [l.marciniak@intibs.pl](mailto:l.marciniak@intibs.pl)

**KEYWORDS** luminescent thermometers, relative sensitivity, host sensitization, neodymium, ytterbium

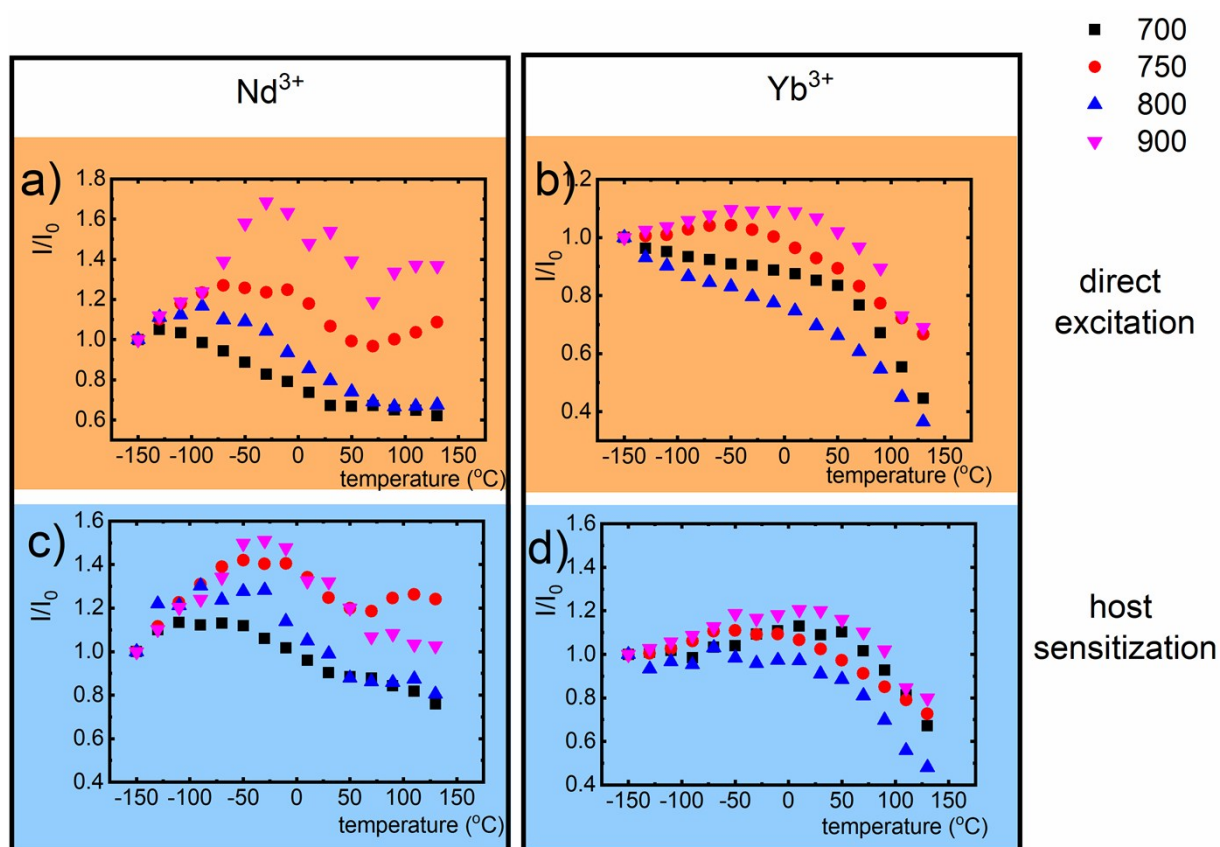

Figure S1. Thermal evolution of  $\text{Nd}^{3+}$  (a and c) and  $\text{Yb}^{3+}$  (b and d) emission intensity observed upon direct (a and b) and host (c and d) excitation.

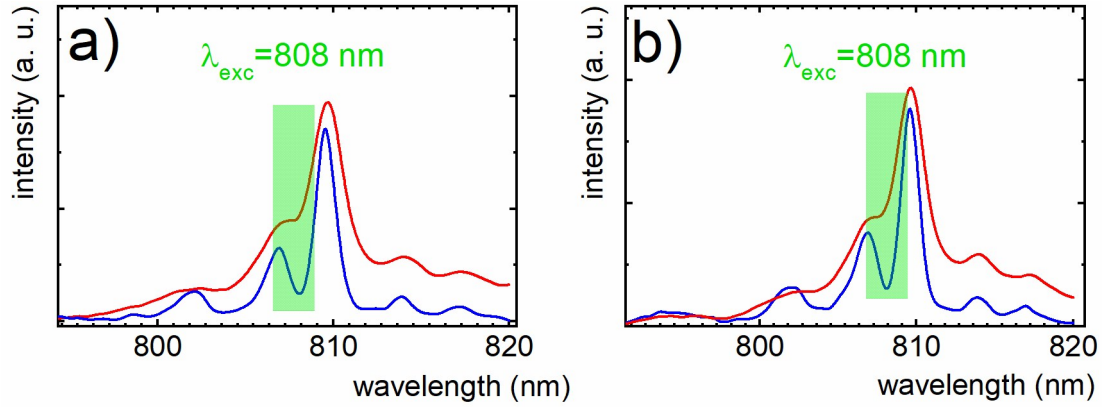

Figure S2. Excitation spectra of  $\text{YVO}_4:\text{Nd}^{3+}, \text{Yb}^{3+}$  nanocrystals annealed at 700°C –a and 900°C–b measured at -150°C (blue line) and at 0°C (red line).

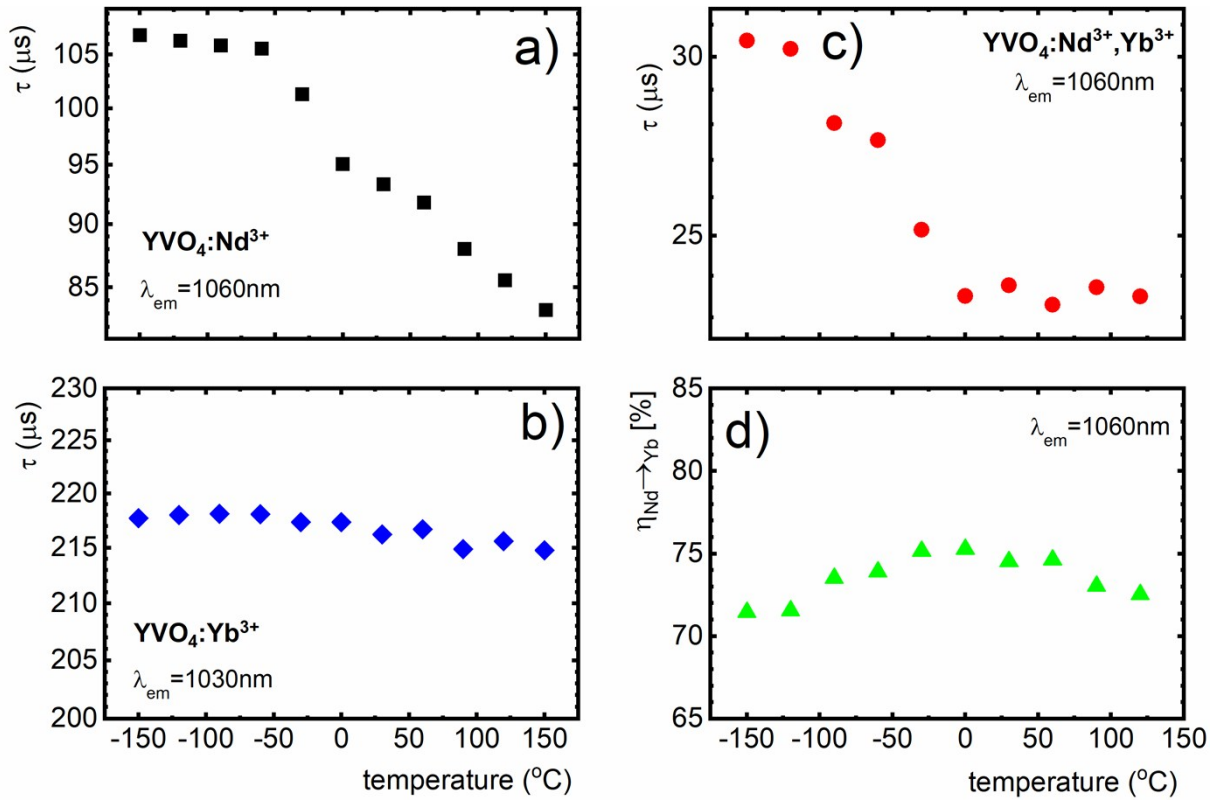

Figure S3. Temperature dependence of lifetime of:  $^4\text{F}_{3/2}$  state of  $\text{Nd}^{3+}$  ions in  $\text{YVO}_4:\text{Nd}^{3+}$  nanocrystals –a;  $^4\text{F}_{3/2}$  state of  $\text{Nd}^{3+}$  ions in  $\text{YVO}_4:\text{Nd}^{3+}, \text{Yb}^{3+}$  nanocrystals –b;  $^2\text{F}_{5/2}$  state of  $\text{Yb}^{3+}$  ions in  $\text{YVO}_4:\text{Yb}^{3+}$  nanocrystals –c, quantum efficiency of Nd to Yb energy transfer, measured as  $\eta_{\text{Nd} \rightarrow \text{Yb}} = 1 - \tau_{\text{NdYb}} / \tau_{\text{Nd}}$  –d

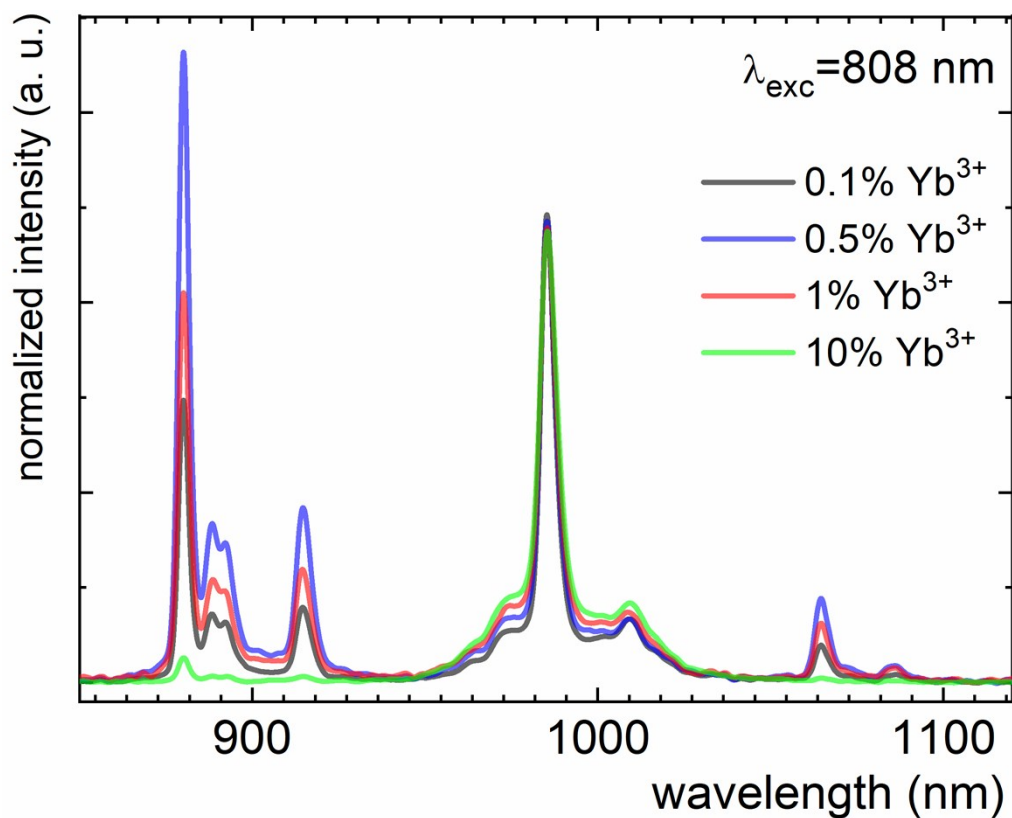

Figure S4. The comparison of emission spectra of YVO<sub>4</sub>:Nd<sup>3+</sup>,xYb<sup>3+</sup> nanocrystals measured at -150°C (normalized to the 980 nm intensity).

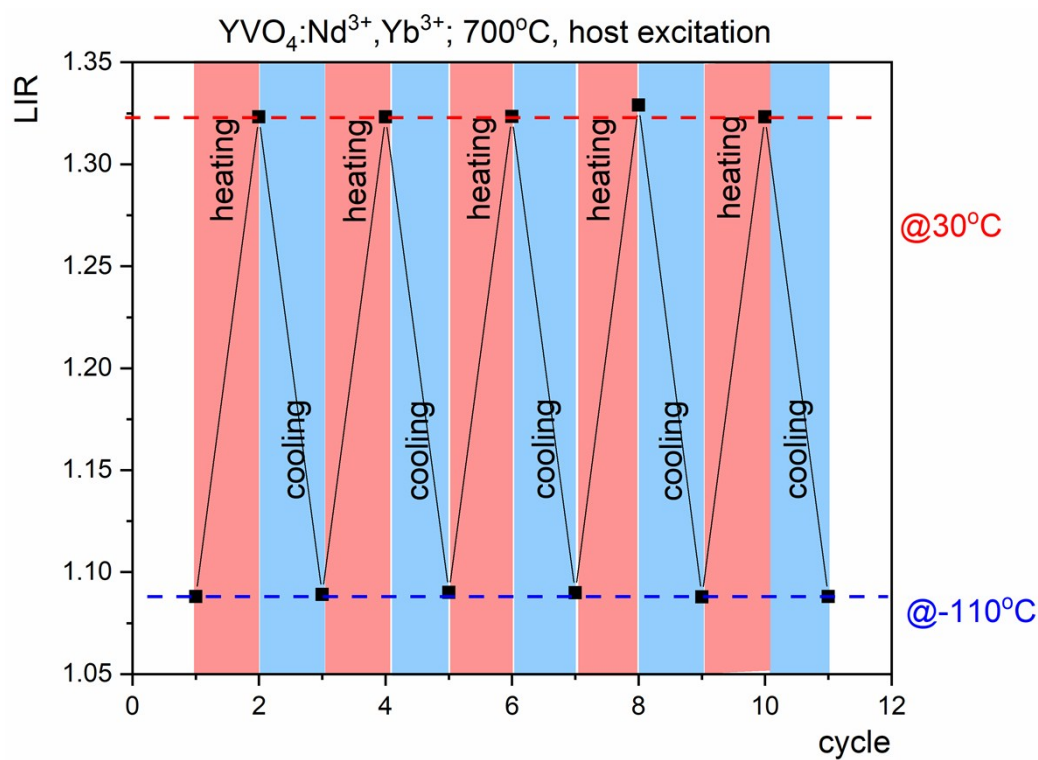

Figure S5. Thermal stability of LIR of YVO<sub>4</sub>:Nd<sup>3+</sup>,Yb<sup>3+</sup>, 700°C nanocrystals during cooling (-110°C) and heating (30°C) cycles upon host excitation

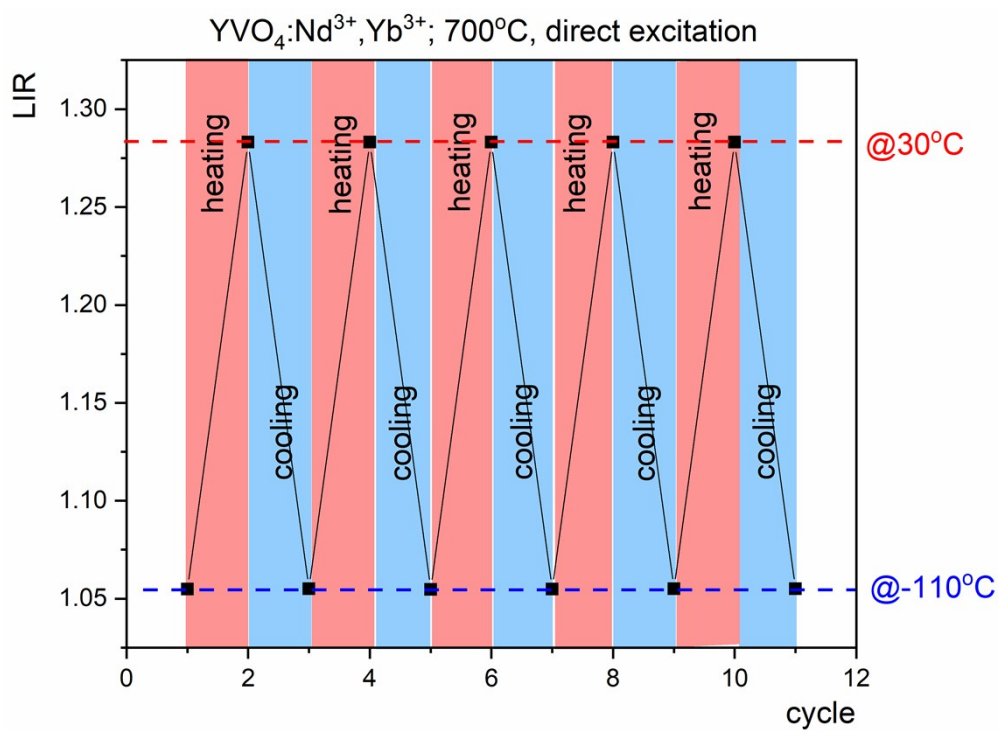

Figure S6. Thermal stability of LIR of  $\text{YVO}_4:\text{Nd}^{3+}, \text{Yb}^{3+}$ ,  $700^\circ\text{C}$  nanocrystals during cooling ( $-110^\circ\text{C}$ ) and heating ( $30^\circ\text{C}$ ) cycles upon host excitation
